# Supplementary material for: Treatment of obesity, with a dietary component, and eating disorder risk in children and adolescents: A systematic review with meta‐analysis
Source: PubMed Central journal article supplement — Obes Rev. 2019 May 26;20(9):1287–98. doi: 10.1111/obr.12866 (PMC6851692; doi:10.1111/obr.12866), 2019-05-26
Supplement: OBR-20-1287-s001.pdf [file OBR-20-1287-s001.pdf]

## **Treatment of obesity, with a dietary component, and eating disorder risk in children and adolescents: a systematic review with meta-analysis**

Hiba Jebeile<sup>1,2</sup>, Megan L Gow<sup>1,2</sup>, Louise A Baur<sup>1,2</sup>, Sarah P Garnett<sup>1,2</sup>, Susan J Paxton<sup>3</sup>, Natalie B Lister<sup>1,2</sup>

<sup>1</sup>The University of Sydney, Children's Hospital Westmead Clinical School, Westmead, Australia

<sup>2</sup>Institute of Endocrinology and Diabetes and Weight Management Services, The Children's Hospital at Westmead, Westmead, Australia

<sup>3</sup>School of Psychology and Public Health, La Trobe University, Melbourne, Australia

### **Corresponding author:**

Ms Hiba Jebeile

The University of Sydney, Children's Hospital Westmead Clinical School, Westmead, Australia

Email: [hiba.jebeile@health.nsw.gov.au](mailto:hiba.jebeile@health.nsw.gov.au)

**Table S1. Search strategy used on the Ovid platform with the Medline database. Search terms contained reference to all three criteria: overweight/obesity, dietary treatment interventions, and eating disorder related outcome measures. Medical Subject Headings (MeSH) are bolded, and key word searches are italicised.**

|                                                                                                                      |                                                                                                 |
|----------------------------------------------------------------------------------------------------------------------|-------------------------------------------------------------------------------------------------|
| 1 exp <b>Obesity</b> /                                                                                               | 21 <i>depress*.tw.</i>                                                                          |
| 2 exp <b>Overweight</b> /                                                                                            | 22 <b>depression</b> /                                                                          |
| 3 <i>obes*.tw.</i>                                                                                                   | 23 <b>Anxiety</b> /                                                                             |
| 4 <i>overweight.tw.</i>                                                                                              | 24 <i>anxi*.tw.</i>                                                                             |
| 5 1 or 2 or 3 or 4                                                                                                   | 25 <i>selfesteem.tw.</i>                                                                        |
| 6 <b>weight loss</b> /                                                                                               | 26 " <b>feeding and eating disorders</b> "/ or <b>anorexia nervosa</b> / or <b>binge eating</b> |
| 7 exp <b>diet therapy</b> /                                                                                          | <b>disorder</b> / or <b>bulimia nervosa</b> / or " <b>feeding and eating disorders of</b>       |
| 8 exp <b>bariatrics</b> /                                                                                            | <b>childhood</b> "/                                                                             |
| 9 exp <b>exercise</b> /                                                                                              | 27 19 or 20 or 21 or 22 or 23 or 24 or 25 or 26                                                 |
| 10 <b>anti-obesity agents</b> / or <b>appetite depressants</b> /                                                     | 28 <b>feeding behavior</b> /                                                                    |
| 11 ( <i>diet* adj2 therap*</i> ). <i>tw.</i>                                                                         | 29 ( <i>bulimi* adj4 symptom*</i> ). <i>tw.</i>                                                 |
| 12 <i>bariatric*.tw.</i>                                                                                             | 30 ( <i>disorder* adj4 eat*</i> ). <i>tw.</i>                                                   |
| 13 ( <i>low adj4 (energy or calor*) adj4 diet</i> ). <i>tw.</i>                                                      | 31 ( <i>emotion* adj4 eat*</i> ). <i>tw.</i>                                                    |
| 14 ( <i>(pharma* or diet* or obes* or lifestyle or behavio*) adj4 (interven* or treat* or therap*)</i> ). <i>tw.</i> | 32 ( <i>external adj4 eat*</i> ). <i>tw.</i>                                                    |
| 15 ( <i>(calori* or diet*) adj4 (reduc* or restrict*)</i> ). <i>tw.</i>                                              | 33 ( <i>diet* adj4 restrain*</i> ). <i>tw.</i>                                                  |
| 16 ( <i>weight adj4 (manag* or los*)</i> ). <i>tw.</i>                                                               | 34 ( <i>binge adj4 eat*</i> ). <i>tw.</i>                                                       |
| 17 <i>exercise.mp. or physical activity.tw.</i>                                                                      | 35 <i>extreme weight loss.tw.</i>                                                               |
| 18 6 or 7 or 8 or 9 or 10 or 11 or 12 or 13 or 14 or 15 or 16 or 17                                                  | 36 28 or 29 or 30 or 31 or 32 or 33 or 34 or 35                                                 |
| 19 <b>Body Image</b> /                                                                                               | 37 5 and 18 and 27                                                                              |
| 20 ( <i>body adj4 (accept* or dissatisf* or image or satisf* or appreciat*)</i> ). <i>tw.</i>                        | 38 limit 37 to (english language and humans and "all child (0 to 18)                            |

**Table S2: Characteristics of included studies reporting change in ED prevalence, ED risk and related symptoms following obesity treatment, with a dietary component, in children and adolescents with overweight or obesity**

| Author, year; program name (if applicable); country; study design; setting; quality rating                                   | Baseline characteristics of sample – # participants (n), %F; age (y), range and mean (SD); BMI related inclusion criteria, mean (SD) BMI z-score/BMI                    | Intervention duration and intensity; duration of follow-up; retention (R)                                                                                                                   | Intervention design: intervention groups (IG)/control (CG); nutrition; physical activity (PA); behavioural components<br><br>Personnel (P) delivering the intervention                                                                                                                                                                                                                                                                                                                                                                                                                                           | Change in weight-related outcomes, mean change (SE)                                                                                                                                                                                                                                          | Eating disorder related outcomes reported (tool used)                |
|------------------------------------------------------------------------------------------------------------------------------|-------------------------------------------------------------------------------------------------------------------------------------------------------------------------|---------------------------------------------------------------------------------------------------------------------------------------------------------------------------------------------|------------------------------------------------------------------------------------------------------------------------------------------------------------------------------------------------------------------------------------------------------------------------------------------------------------------------------------------------------------------------------------------------------------------------------------------------------------------------------------------------------------------------------------------------------------------------------------------------------------------|----------------------------------------------------------------------------------------------------------------------------------------------------------------------------------------------------------------------------------------------------------------------------------------------|----------------------------------------------------------------------|
| Bonham et al. 2017 <sup>1</sup> ; JenMe; Australia; RCT; Commercial program; positive                                        | n=74 (IG 42, CG 32), 74% F<br><br>13-17y, 15.3 (1.3)y<br><br>BMI ≥ 85 <sup>th</sup> percentile<br>BMI IG 33.5 (6.0) kg/m <sup>2</sup> , CG 31.6 (4.0) kg/m <sup>2</sup> | 13 wk<br><br>Weekly, one-on-one sessions<br><br>Follow-up 36 wk from baseline<br><br><b>R:</b> IG 76%, CG 72% at 13 wk; 36% at 36 wk (IG only)                                              | <b>IG:</b> Three education topics: Eat Well, Move more and Live life; individualized menu with pre-packaged food provided by the commercial program combined with own grocery items; worked with consultant towards using all of their own foods; PA education, overcoming barriers; goal setting, encouraged to modify small behaviours, body image, monitoring of progress<br><br><b>Wait-list CG:</b> received 'Healthy Eating for Children' booklet based on healthy eating guidelines; advised to maintain current lifestyle habits for the control period<br><br><b>P:</b> Trained Jenny Craig consultants | <b>BMI z-score</b><br>IG, pre-post: -0.21 (0.05)*<br>Pre-FU: -0.36 (0.12)*<br><br>CG, pre-post: 0.00 (0.06), nil FU<br><br><b>BMI</b><br>IG, pre-post: -2.0 (0.76) kg/m <sup>2</sup> *<br>Pre-FU: -3.5 (0.89) kg/m <sup>2</sup> *<br><br>CG, pre-post: 0.5 (0.57) kg/m <sup>2</sup> , nil FU | Bulimia (EAT-26)<br>ED risk (EAT-26)<br><br>Outcomes NR at follow-up |
| Boutelle et al. 2018 <sup>2</sup> ; Preventing Emotional Eating Routines (PEER); USA; pre-post; tertiary outpatient; neutral | n=30, 87% F<br><br>13-17y, 14.6 (1.2)y<br><br>BMI 85-99 <sup>th</sup> percentile<br>BMI z-score 2.27 (0.41)                                                             | 4 mo<br><br>16 weekly sessions (60 or 90 min), adolescent alone, parent alone, adolescent and parent combined<br><br>Follow-up 7 mo from baseline<br><br><b>R:</b> 70% at 4mo; follow-up NR | <b>IG:</b> four treatment components - DBT to target emotion regulation, FBT for weight loss (nutrition and PA education; stimulus control, planning ahead, and relapse prevention), behavioural coaching to encourage adherence to DBT and FBT skills, and Emotion-Focused parent training to support the adolescent<br><br><b>P:</b> Graduate students, post-doc researchers                                                                                                                                                                                                                                   | <b>BMI z-score</b><br>Pre-post: -0.06 (0.06)<br>Pre-FU: -0.09 (0.06)<br><br><b>BMI</b><br>Pre-post: -0.60 (0.81) kg/m <sup>2</sup><br>Pre-FU: -1.0 (0.78) kg/m <sup>2</sup>                                                                                                                  | Emotional eating (EES)                                               |
| Braet et al. 2000 <sup>3</sup> ; Belgium; RCT;                                                                               | n=136 (IG1 26, IG2 16, IG3 36, IG4 58),                                                                                                                                 | 12 mo                                                                                                                                                                                       | All groups received 12-session CBT protocol designed to help the child change lifestyle behaviours,                                                                                                                                                                                                                                                                                                                                                                                                                                                                                                              | <b>%overweight</b><br>IG1, pre-post: -12.0                                                                                                                                                                                                                                                   | Emotional eating (DEBQ)                                              |

|                                                                                                                                                                                                                  |                                                                                                                      |                                                                                                                                                                                                                                                                                                                                                                                                                                |                                                                                                                                                                                                                                                                                                                                                                                                                                                                                                                                                 |                                                                                                                                                                                                                                                                |                                                                                                                                                                                                    |
|------------------------------------------------------------------------------------------------------------------------------------------------------------------------------------------------------------------|----------------------------------------------------------------------------------------------------------------------|--------------------------------------------------------------------------------------------------------------------------------------------------------------------------------------------------------------------------------------------------------------------------------------------------------------------------------------------------------------------------------------------------------------------------------|-------------------------------------------------------------------------------------------------------------------------------------------------------------------------------------------------------------------------------------------------------------------------------------------------------------------------------------------------------------------------------------------------------------------------------------------------------------------------------------------------------------------------------------------------|----------------------------------------------------------------------------------------------------------------------------------------------------------------------------------------------------------------------------------------------------------------|----------------------------------------------------------------------------------------------------------------------------------------------------------------------------------------------------|
| camp and outpatient; neutral                                                                                                                                                                                     | 68% F<br>7-17y, 11 (2.5)y<br>≥ 20% overweight<br>% overweight IG1 52 (13)%, IG2 50 (19)%, IG3 60 (23)%, IG4 52 (22)% | Varied intensity and mode of delivery<br><br><b>IG1:</b> group therapy, 6 x 90 min biweekly sessions, for 3-4 mo<br><b>IG2:</b> Individual therapy, 12 x 60 min sessions<br><b>IG3:</b> 10d summer camp,<br><b>IG1/2/3:</b> monthly parent/child follow-up sessions to 12 mo<br><br><b>IG4:</b> 1 x 90 min family session<br><br>Follow-up 4.6 years from baseline<br><br><b>R:</b> IG1 73%, IG2 81%, IG3 83%, IG4 81% at 4.6y | enhance self-regulation and problem-solving skills; nutrition education; daily aerobic exercise promoted; behaviour change diary.<br><br><b>IG1:</b> outpatient group therapy<br><b>IG2:</b> individual therapy<br><b>IG3:</b> summer camp; meals at camp based on 1500kcal/d; 5 hr/d exercise<br><b>IG 4 (self-selected controls):</b> advice only; children and parents received the same information as other groups during one family session<br><br><b>P:</b> Multidisciplinary team                                                       | (2.4)%*<br>Pre-FU: -18.0 (3.1)%*<br><br>IG2, pre-post: -8.0 (3.8)%*<br>Pre-FU: -11.0 (4.8)%*<br><br>IG3, pre-post: -18.0 (3.1)*<br>Pre-FU: -15.0 (3.1)%*<br><br>IG4, pre-post: -6.0 (2.5)%*<br>Pre-FU: -7.0 (3.1)%*                                            | Outcome reported between baseline and follow-up only                                                                                                                                               |
| Braet et al. 2004 <sup>4</sup> , Braet et al. 2006 <sup>5</sup> ; Belgium; pre-post; inpatient; neutral<br><br>Braet et al. 2003 <sup>6</sup> (subsample of the above study with a non-randomised control group) | n=150, 66% F<br>7-17y, 12.7 (2.3)y<br><br>BMI>95 <sup>th</sup> percentile<br>BMI 32.2 (5.2) kg/m <sup>2</sup>        | 10 mo<br><br>Inpatient program<br><br>Follow-up 24-36 months from baseline<br><br><b>R:</b> 81% at 10 mo (n=21 completed early); 73% at 36 mo                                                                                                                                                                                                                                                                                  | <b>IG:</b> 'non-diet' healthy lifestyle program; 1400-1600 kcal/d energy intake, 3 meals and 2 snacks; structured PA, 4 hr/wk individualised program and 10 hr/wk organised sport; small group CBT program for 12 wk including self-regulation, self-evaluation, self-reward, and development of a personal plan. Parents education biweekly, on preparing healthy food, shopping and aerobic exercises<br><br><b>Wait-list CG</b> (Braet et al. 2003 only), did not complete ED related questionnaires<br><br><b>P:</b> Multidisciplinary team | <b>BMI</b><br>IG, pre-post: -8.6 (0.4) kg/m <sup>2</sup> *<br>pre-FU: -4.9 (0.4) kg/m <sup>2</sup> *<br><br>Braet et al. 2003 n=76 (IG 38, CG 38)<br><b>Weight, median (range)</b><br>IG, pre-post: -19 kg (+2 to -41kg)<br>CG, pre-post: +4 kg (+21 to -11kg) | Binge eating EDE<br>Binge eating disorder (EDE)<br>Bulimic symptoms (EDI)<br>Bulimia nervosa (EDE)<br>ED risk (EDE)<br>Drive for thinness (EDI)<br>Eating concern (EDE)<br>Emotional eating (DEBQ) |
| Brennan et al. 2012 <sup>7</sup> ; CHOOSE Health Program; Australia; community; RCT; positive                                                                                                                    | n=63 (IG 42, CG 21), 54% F<br>11-19 y, 14.3 (1.9)y<br><br>Overweight/obesity<br>BMI z-score IG 2.08                  | 16 wk<br><br>10x60 min weekly individual face-to-face sessions + one phone call, then 2x60 minute sessions biweekly                                                                                                                                                                                                                                                                                                            | <b>IG:</b> nutrition and PA education; CBT to assist adolescent and family to manage the environmental, social and psychological barriers to change, goal setting, self-monitoring, eating behaviours, problem solving<br><br><b>Wait-list CG:</b> offered treatment after 6 mo while IG in the maintenance phase                                                                                                                                                                                                                               | <b>BMI z-score</b><br>IG, Pre-post: -0.09 (0.05)<br>Pre-FU: -0.10 (0.053)<br><br>CG, pre-post: 0.01 (0.07)<br>Nil FU                                                                                                                                           | Bulimic symptoms (EDI-II)<br>Drive for thinness (EDI-II)                                                                                                                                           |

|                                                                                                                                                           |                                                                                                                                                                                             |                                                                                                                                                                                     |                                                                                                                                                                                                                                                                                                                                                                                                     |                                                                                                                     |                                               |
|-----------------------------------------------------------------------------------------------------------------------------------------------------------|---------------------------------------------------------------------------------------------------------------------------------------------------------------------------------------------|-------------------------------------------------------------------------------------------------------------------------------------------------------------------------------------|-----------------------------------------------------------------------------------------------------------------------------------------------------------------------------------------------------------------------------------------------------------------------------------------------------------------------------------------------------------------------------------------------------|---------------------------------------------------------------------------------------------------------------------|-----------------------------------------------|
|                                                                                                                                                           | (0.37), CG 2.08 (0.40)                                                                                                                                                                      | 6 mo maintenance phase:<br>2x60 min visits + 7x15 min phone calls<br><br>Nil follow-up<br><br><b>R:</b> IG 48%, CG 67%                                                              | <b>P:</b> Psychologist                                                                                                                                                                                                                                                                                                                                                                              |                                                                                                                     |                                               |
| Carnier et al. 2008 <sup>8</sup> ; Lofrano-Prado et al. 2009 <sup>9</sup> ; Brazil; pre-post; tertiary outpatient; neutral                                | n=66, 62% F<br><br>15-19y, girls 16.56 (1.99)y, boys 16.20 (2.09)y<br><br>BMI>95 <sup>th</sup> percentile<br>BMI girls 35.53 (4.19) kg/m <sup>2</sup> , boys 35.78 (4.25) kg/m <sup>2</sup> | 6 mo<br><br>5 x 1-hr sessions/wk (3 x supervised exercise, 1 nutrition, 1 psychological group sessions) + 1/mo visit with endocrinologist<br><br>Nil follow-up<br><br><b>R:</b> 88% | <b>IG:</b> nutrition education, encouraged to follow a balanced diet and reduce food intake; supervised personalised moderate intensity exercise program; psychological group sessions to discuss body image, eating disorders, food and feelings, individual therapy when problems identified<br><br><b>P:</b> Multidisciplinary team                                                              | <b>BMI</b><br>Girls, pre-post: -2.94 (0.66) kg/m <sup>2</sup> *<br>Boys, pre-post: -3.74 (0.88) kg/m <sup>2</sup> * | Binge eating (BES)<br>Bulimic symptoms (BITE) |
| Carnier et al. 2010 <sup>10</sup> ; Carnier et al. 2012 <sup>11</sup> ; Damaso et al. 2013 <sup>12</sup> ; Brazil; pre-post; tertiary outpatient; neutral | n=97, 58% F<br><br>15-19y, mean age NR<br><br>BMI > 95 <sup>th</sup> percentile<br>BMI 37.0 (4.95) kg/m <sup>2</sup>                                                                        | 1 year<br><br>5 x 1-hr sessions/wk (3 x exercise, 1 x nutrition, 1 x psychological group sessions); 1/mo visit with endocrinologist<br><br>Nil follow-up<br><br><b>R:</b> 79%       | <b>IG:</b> nutrition education, encouraged to follow a balanced diet and reduce food intake; supervised personalised moderate intensity exercise program; psychological group sessions to discuss body image, eating disorders, food and feelings, individual therapy when problems identified<br><br><b>P:</b> Multidisciplinary team                                                              | <b>BMI</b><br>IG, pre-post: -4.1 (0.46) kg/m <sup>2</sup> *                                                         | Binge eating (BES)<br>Bulimic symptoms (BITE) |
| Chirita-Emandi et al. 2014 <sup>13</sup> ; Romania; NRCT; outpatient; neutral                                                                             | n=40 (IG 17, 58% F, CG 23, 50% F)<br><br>6-18 y, IG 11.2y, CG 10.9y (SD NR)<br><br>BMI>85 <sup>th</sup> percentile<br>BMI z-score IG1 2.79, IG2 2.76 (SD NR)                                | 10 wk<br><br><b>IG1:</b> 20 biweekly sessions<br><b>IG2:</b> one education session<br><br>Follow-up 6 months from baseline<br><br><b>R:</b> IG1 71%, IG2 96% at 6 mo                | <b>IG1:</b> Lifestyle intervention with whole family approach; nutrition education, avoid restrictive feeding behaviour allowing child to self-regulate meals; PA education to aim for >1hr per day PA, reducing screen time <2hrs per day. <i>Plus</i> 20x30 min individual infra- low-frequency neurofeedback training<br><br><b>IG2:</b> Lifestyle intervention only<br><br><b>P:</b> Counsellor | <b>BMI z-score (SE NR)</b><br>IG1: pre 2.79, post 2.5, FU 2.48<br><br>IG2: pre 2.76, post 2.39, FU 2.2              | Emotional eating (TFEQ)                       |
| Cohen et al.                                                                                                                                              | n=78 (IG1 25, IG2 25,                                                                                                                                                                       | 8 mo                                                                                                                                                                                | All groups (including CG) received the same nutrition and PA                                                                                                                                                                                                                                                                                                                                        | <b>BMI z-score</b>                                                                                                  | Emotional eating                              |

|                                                                                                                                         |                                                                                                                                                               |                                                                                                                                                                                       |                                                                                                                                                                                                                                                                                                                                                                                                                                                                                                                                                                                                                                                                                                                  |                                                                                                                                                                                                         |                                                                                       |
|-----------------------------------------------------------------------------------------------------------------------------------------|---------------------------------------------------------------------------------------------------------------------------------------------------------------|---------------------------------------------------------------------------------------------------------------------------------------------------------------------------------------|------------------------------------------------------------------------------------------------------------------------------------------------------------------------------------------------------------------------------------------------------------------------------------------------------------------------------------------------------------------------------------------------------------------------------------------------------------------------------------------------------------------------------------------------------------------------------------------------------------------------------------------------------------------------------------------------------------------|---------------------------------------------------------------------------------------------------------------------------------------------------------------------------------------------------------|---------------------------------------------------------------------------------------|
| <p>2018<sup>14</sup>; McGill Youth Lifestyle Intervention with Food and Exercise (MY LIFE) Study; Canada; RCT; outpatient; positive</p> | <p>CG 28), 58% F<br/>6-8y, 7.8 (0.8)y<br/>BMI≥85<sup>th</sup> percentile<br/>Mean BMI NR</p>                                                                  | <p>1-5 mo: 5 x 1.5 hr group sessions<br/><br/>1 x group sessions at 8 mo<br/>Follow-up at 12 mo from baseline<br/><br/><b>R:</b> IG1 92%, IG2 96%, CG 93% at 12 mo</p>                | <p>education at baseline.<br/><br/><b>Intervention groups:</b> nutrition and PA education; managing hunger; encourage daily PA; FBT components using motivational interviewing techniques, reflective listening, sharing decision making with the child and families, and realistic goal setting with the child.<br/><br/><b>IG1:</b> standard treatment – recommends two serves per day of milk and alternatives<br/><br/><b>IG2:</b> modified treatment - recommends four serves per day of milk and alternatives<br/><br/><b>CG:</b> no additional treatment. Offered treatment 6 mo after the 12 mo study period<br/><br/><b>P:</b> bilingual registered dietitian with experience in physical education</p> | <p>IG1: reduced at 6* and 12* months<br/><br/>IG2: reduced at 6* and 12* months</p>                                                                                                                     | <p>(CEBQ)</p>                                                                         |
| <p>Croker et al. 2012<sup>15</sup>; UK; primary care; RCT; positive</p>                                                                 | <p>n=72 (IG 37, CG 35), 69% F<br/><br/>8–12y, 10.3 (1.6)y<br/><br/>Overweight/obesity defined by IOTF<br/>BMI z-score 3.14 (0.72)</p>                         | <p>6 mo<br/><br/>15 sessions: 10 weekly, 3 biweekly, 2 monthly<br/><br/>Follow-up 10 mo from baseline<br/><br/><b>R:</b> IG 59%, CG 97% at 6 mo and 10 mo</p>                         | <p><b>IG:</b> FBT including whole family lifestyle change; nutrition education based on the TLD and Eatwell plate; PA education; behavioural programme including self-monitoring, goal setting, and stimulus control<br/><br/><b>Waitlist-CG:</b> completed treatment following 6 mo on wait-list<br/><br/><b>P:</b> Multidisciplinary team</p>                                                                                                                                                                                                                                                                                                                                                                  | <p><b>BMI z-score</b><br/>IG, pre-post: -0.11 (0.028)*<br/>CG, pre-post: -0.10 (0.027)*<br/><br/><b>BMI</b><br/>pre-post<br/>IG -0.36 (0.19) kg/m<sup>2</sup>*<br/>CG -0.03 (0.18) kg/m<sup>2</sup></p> | <p>Bulimic symptoms (ChEAT)<br/>ED risk (ChEAT)<br/><br/>Outcomes NR at follow-up</p> |
| <p>DeBar et al. 2012<sup>16</sup>; USA; RCT; primary care; positive</p>                                                                 | <p>n=208 (IG1 105, IG2 103), 100% F<br/><br/>12-17y, 14.1 (1.4)y<br/><br/>BMI≥90<sup>th</sup> percentile<br/>BMI z-score IG1 2.00 (0.34), IG2 2.00 (0.33)</p> | <p>5 mo<br/><br/>90 min meeting/wk for 3 mo, then biweekly for 2 mo<br/><br/>Follow-up 12 mo from baseline<br/><br/><b>R:</b> IG1 95%, IG2 92% at 5 mo; IG1 86%, IG2 81% at 12 mo</p> | <p><b>IG1:</b> nutrition education, 1600-1800 kcal/d; PA education with targets of 30-60 min of PA/d, on 5 d/wk, 15 min/d yoga, limiting screen time to 2 hr/d; behavioural component including self-monitoring, goal setting, stimulus control and addressing issues associated with obesity in adolescent girls including depression, disordered eating and body image<br/><br/><b>IG2:</b> usual care; written education material, including evidence-based approaches to weight management; parents' guide, local resources, suggested books and online materials<br/><br/><b>P:</b> Nutritionist, clinical psychologist</p>                                                                                 | <p><b>BMI z-score</b><br/>IG1, pre-post: -0.12 (0.03)*<br/>Pre-FU: -0.15 (0.04)*<br/><br/>IG2, pre-post: -0.06 (0.029)*<br/>Pre-FU: -0.08 (0.03)*</p>                                                   | <p>Binge-related ED (QEWP-A)</p>                                                      |
| <p>De Niet et al.</p>                                                                                                                   | <p>n=141 (IG1 73, IG2</p>                                                                                                                                     | <p>1 y</p>                                                                                                                                                                            | <p>All families are enrolled in 'Big Friends Club' (BFC) FBT</p>                                                                                                                                                                                                                                                                                                                                                                                                                                                                                                                                                                                                                                                 | <p><b>BMI z-score</b></p>                                                                                                                                                                               | <p>Emotional eating</p>                                                               |

|                                                                                                                                                                                   |                                                                                                                                                                                 |                                                                                                                                                           |                                                                                                                                                                                                                                                                                                                                                                                                                                                                                                                                                                                                 |                                                                                                                            |                                                          |
|-----------------------------------------------------------------------------------------------------------------------------------------------------------------------------------|---------------------------------------------------------------------------------------------------------------------------------------------------------------------------------|-----------------------------------------------------------------------------------------------------------------------------------------------------------|-------------------------------------------------------------------------------------------------------------------------------------------------------------------------------------------------------------------------------------------------------------------------------------------------------------------------------------------------------------------------------------------------------------------------------------------------------------------------------------------------------------------------------------------------------------------------------------------------|----------------------------------------------------------------------------------------------------------------------------|----------------------------------------------------------|
| 2012 <sup>17</sup> ; Short Message Service Maintenance Treatment (SMSMT); Netherlands; RCT; tertiary outpatient; positive<br><br>Data from baseline to 3-mo used in meta-analysis | 68), 64% F<br>7-12y, 9.9 (1.3)y<br><br>Overweight/obesity<br>BMI z-score 2.59 (0.45)                                                                                            | 3 mo BFC program: 6 weekly sessions + 2 biweekly sessions<br><br>Group sessions at 6, 9, and 12 mo<br><br>Nil follow-up<br><br><b>R:</b> IG1 86%, IG2 69% | intervention at baseline - provides nutrition and PA education; parents discussion of strategies for healthy eating and physical activity; children exercise together during group sessions<br><br>At 3 mo, families transition to reduced intensity intervention and randomised to receive an SMS maintenance treatment, or no SMS.<br><br><b>IG1:</b> received SMS support messages for 9 mo following the intensive phase; focus on self-monitoring, personalised feedback, behaviour change<br><br><b>IG2:</b> groups sessions only, no SMS support<br><br><b>P:</b> Multidisciplinary team | IG1, pre-post: -0.25 (0.05)*<br><br>IG2, pre-post: -0.20 (0.05)*                                                           | (DEBQ)                                                   |
| De Miguel-Etayo 2016 <sup>18</sup> ; Spain; pre-post; outpatient; neutral                                                                                                         | n=156, 54% F<br>13-16y, median age (25% CI) 14.59 (13.62-15.50)y<br><br>Overweight/obesity<br>BMI males 31.82 (4.48) kg/m <sup>2</sup> , females 31.69 (5.39) kg/m <sup>2</sup> | 13 mo<br><br>Weekly groups for 2 mo, then monthly for 11 mo<br><br>Nil follow-up<br><br><b>R:</b> 72%                                                     | <b>IG:</b> calorie restriction of 10-40% based on BMI category, meal plan for first 3 wk, followed by food portion exchange protocol for 6 wk, then flexible meal plans based on food-portion exchanges; goal to achieve at least 60 min of moderate-to-vigorous physical activity 3-5 d/wk; psychological support included workshops focusing on eating and PA behaviour patterns, troubleshooting techniques to encourage adherence and prevent relapse<br><br><b>P:</b> paediatricians                                                                                                       | <b>BMI</b><br>Females, pre-post: -1.66 (0.45) kg/m <sup>2</sup> *<br><br>Males, pre-post: -1.43 (0.45) kg/m <sup>2</sup> * | Bulimic symptoms (EDI-II)<br>Drive for thinness (EDI-II) |
| Edwards et al. 2006 <sup>19</sup> ; UK; pre-post; tertiary outpatient; neutral                                                                                                    | n=33, 70% F<br>8-13y, 10.1 (1.6)y<br><br>BMI≥98 <sup>th</sup> percentile<br>BMI z-score 3.23 (0.48)                                                                             | 4 mo<br><br>1.5 hr group sessions, 8 weekly then 4 biweekly sessions<br><br>Follow-up 7 mo from baseline<br><br><b>R:</b> 82% at 4mo; 61% at 7 mo         | <b>IG:</b> FBT with concurrent parent and child group sessions; nutrition education based on the TLD; PA education, increase to 60 mins/d; behaviour modification techniques including self-monitoring, goal setting, stimulus control. Parent education in behaviour management to support behaviour change for the child<br><br><b>P:</b> NR                                                                                                                                                                                                                                                  | <b>BMI z-score</b><br>Pre-post: -0.15 (0.08)*<br><br>Maintained at follow-up<br>p<0.001 (data NR)                          | ED risk (ChEAT)<br><br>Outcomes NR at follow-up          |
| Epstein et al. 2001 <sup>20</sup> ; USA; RCT; tertiary outpatient; neutral                                                                                                        | n=67, 47% F<br>8-12y, 10.3 (1.1)y<br><br>20-100% overweight                                                                                                                     | 6 mo<br><br>15-30 min individual + 30 min group/wk for 16wk, then 2 biweekly meetings                                                                     | All participants were provided similar nutrition, PA and behaviour change education at each visit. Individual therapist and separate child and parent groups<br><br>TLD with initial caloric goal of 1000-1200 kcal/d, adjusted to                                                                                                                                                                                                                                                                                                                                                              | <b>% overweight</b><br>Combined groups, pre-FU: -12.50 (1.97)%*                                                            | ED risk (KEDS)<br>Bulimic symptoms (KEDS)                |

|                                                                                                             |                                                                                                                                                                           |                                                                                                                                                                                                                                         |                                                                                                                                                                                                                                                                                                                                                                                                                                                                                                                                                                                                        |                                                                                                                     |                                                                     |
|-------------------------------------------------------------------------------------------------------------|---------------------------------------------------------------------------------------------------------------------------------------------------------------------------|-----------------------------------------------------------------------------------------------------------------------------------------------------------------------------------------------------------------------------------------|--------------------------------------------------------------------------------------------------------------------------------------------------------------------------------------------------------------------------------------------------------------------------------------------------------------------------------------------------------------------------------------------------------------------------------------------------------------------------------------------------------------------------------------------------------------------------------------------------------|---------------------------------------------------------------------------------------------------------------------|---------------------------------------------------------------------|
| Reports follow-up only                                                                                      | BMI 27.4 (3.2) kg/m <sup>2</sup>                                                                                                                                          | and 2 monthly meetings<br><br>Follow-up 2 y from baseline<br><br><b>R:</b> 70% at 2y                                                                                                                                                    | promote weight loss of ~0.5 lb/wk in children and 1 lb/wk in adults, with the lower caloric level never <1000 kcal/d; education to increase PA; goal setting and praise for targeting eating and activity behaviours<br><br><b>IG1:</b> problem-solving skills taught to parent and child<br><b>IG2:</b> problem-solving skills taught to child only<br><b>IG3:</b> no additional problem-solving skills<br><br><b>P:</b> Therapist                                                                                                                                                                    |                                                                                                                     |                                                                     |
| Estabrook et al. 2009 <sup>21</sup> ; USA; RCT; tertiary outpatient; positive<br><br>Reports follow-up only | n=220 (IG1 50, IG2 85, IG3 85), 46% F<br><br>8-12y, 10.7 (1.4)y<br><br>BMI ≥ 85 <sup>th</sup> percentile<br>BMI z-score IG1 2.04 (0.02), IG2 2.06 (0.04), IG3 2.03 (0.04) | 1-12 wk<br><br>IG1: 1 week<br>IG2: 2 weeks, 2 x 2 hr group sessions<br>IG3: 12 wk, 2 x 2 hr group sessions + 10 telephone counselling sessions<br><br>Follow-up 12 mo from baseline<br><br><b>R:</b> IG1 72%, IG2 67%, IG3 74% at 12 mo | <b>IG1:</b> Family Connections (FC) workbook for parents; homework assignments to encourage lasting change; promoted increased fruits and vegetables and decreased sugared-drink; increased PA<br><b>IG2:</b> FC- workbook for parents + two small group sessions with a registered dietitian<br><b>IG3:</b> FC- workbook + two small group sessions with a registered dietitian + automated telephone counselling sessions on goal setting related to eating and PA<br><br><b>P:</b> Research assistants (IG1), dietitian (IG2, IG3)                                                                  | <b>BMI z-score</b><br>IG1, pre-FU: -0.06 (0.02)*<br><br>IG2, pre-FU: -0.02 (0.03)<br><br>IG3, pre-FU: -0.08 (0.03)* | ED risk (KEDS)                                                      |
| Fennig et al. 2015 <sup>22</sup> ; Israel; pre-post; inpatient + outpatient; neutral                        | n=17, 67% F<br><br>8-17y, 14.47 (2.61)y<br><br>BMI>40 with complications or BMI>50<br>BMI 44.79 (10.27) kg/m <sup>2</sup>                                                 | 12 wk<br><br>4-wk hospital admission, then hospital visits 2 d/wk for 8 wk<br><br>Nil follow-up<br><br><b>R:</b> 88%                                                                                                                    | <b>Hospital intervention:</b> calorie restriction 1400-1600 kcal/d, family intervention, behavioural and cognitive therapy, PA education<br><b>Post-hospital:</b> Individual daily menu (1400-1600 kcal/d, 3 meals, 3 snacks); individual PA plan, biweekly exercise classes; CBT 2d/wk, including regular weighing, self-monitoring, addressing self-evaluation of body shape, weight and eating habits<br><b>Family intervention:</b> weekly parent education with dietitian and in a group to address behaviour change to facilitate and maintain weight loss<br><br><b>P:</b> Dietitian, therapist | <b>BMI</b><br>Pre-post: -3.15 (2.05) kg/m <sup>2</sup> *                                                            | Bulimic symptoms (EDI)<br>Eating concern (EDE-Q)<br>ED risk (EDE-Q) |
| Follansbee-Junger et al. 2010 <sup>23</sup> ; USA; RCT; community; neutral                                  | n=67 (IG1 24, IG2 24, IG3 19), 48% F<br><br>8-13y, 10.7y (SD NR)                                                                                                          | 4 mo<br><br>12 x 90 min group sessions, weekly for 8 wk, then biweekly for 8 wk                                                                                                                                                         | Group sessions based on Stoplight Program; nutrition education, use of food diary but did not track energy intake; increased PA using a pedometer-based step program, reduced sedentary time; goal setting, addressed self-esteem, body image and behavioural management techniques                                                                                                                                                                                                                                                                                                                    | <b>BMI z-score</b> <sup>a</sup><br>IG1, pre-post: -0.14 (0.06)*<br>Pre-FU: -0.09 (0.06)                             | ED risk (ChEAT)                                                     |



|                                                                                                         |                                                                                                                                                         |                                                                                                                                                                                                                                                                |                                                                                                                                                                                                                                                                                                                                                                                                                                                                                                                                                                                                                                                                                                                                                                                                                                                                                                                                                                                                                                                                                                                  |                                                                                                                                                                                                       |                                                                                                      |
|---------------------------------------------------------------------------------------------------------|---------------------------------------------------------------------------------------------------------------------------------------------------------|----------------------------------------------------------------------------------------------------------------------------------------------------------------------------------------------------------------------------------------------------------------|------------------------------------------------------------------------------------------------------------------------------------------------------------------------------------------------------------------------------------------------------------------------------------------------------------------------------------------------------------------------------------------------------------------------------------------------------------------------------------------------------------------------------------------------------------------------------------------------------------------------------------------------------------------------------------------------------------------------------------------------------------------------------------------------------------------------------------------------------------------------------------------------------------------------------------------------------------------------------------------------------------------------------------------------------------------------------------------------------------------|-------------------------------------------------------------------------------------------------------------------------------------------------------------------------------------------------------|------------------------------------------------------------------------------------------------------|
|                                                                                                         | Overweight/obesity<br>BMI z-score IG1 2.15 (0.24), IG2 2.15 (0.46), CG 2.15 (0.42)                                                                      | Follow-up 10 mo from baseline<br><br><b>R:</b> 85% at 4 mo; IG1 75%, IG2 71%, IG3 79% at 10 mo                                                                                                                                                                 | <b>IG1:</b> Parents only group<br><br><b>IG2:</b> Family based group – parents and children participated in simultaneous but separate groups; youth sampled a healthy snack each wk and participated in fun PA<br><br><b>CG:</b> Wait-list control group<br><br><b>P:</b> NR                                                                                                                                                                                                                                                                                                                                                                                                                                                                                                                                                                                                                                                                                                                                                                                                                                     | IG2, pre-post: -0.08 (0.07)<br>Pre-FU: -0.12 (0.08)<br><br>CG, pre-post: -0.01 (0.08)<br>Pre-FU: 0.02 (0.08)                                                                                          |                                                                                                      |
| Goldschmidt et al. 2014 <sup>24</sup> ; USA; RCT; tertiary outpatient; neutral                          | n=150 (IG1 51, IG2 50, IG3, 49), 69% F<br><br>7-12y, 9.85 (1.3)y<br><br>20-100% above their age- and sex-specific median BMI<br>BMI z-score 2.21 (0.30) | 9 mo<br><br>FBT, 5 mo: 20 weekly sessions (20 min individual families, 40-min groups)<br><br>Maintenance, 4 mo: 16 weekly sessions<br><br>Follow-up 29 mo from baseline<br><br><b>R:</b> IG1 92%, IG2 94%, IG3 94% at 9 mo; IG1 84%, IG2 86%, IG3 78% at 29 mo | All groups completed FBT before randomisation to a maintenance program<br><br><b>FBT:</b> separate parent and child group sessions; basic weight control strategies using TLD, energy target of 1200-1500 kcal/d to facilitate weight loss of 0.5-1 lb/week; goal to achieve 90 min/wk moderate-intense PA; behavioural skills for weight control in the family context including self-monitoring, parent modelling, positive reinforcement, stimulus control<br><br><b>IG1:</b> Behavioural skills maintenance treatment - focused on helping families develop behavioural weight maintenance skills; modify energy intake from weight loss treatment to an individualised level consistent with weight maintenance<br><br><b>IG2:</b> Social facilitation maintenance – helping families change social environment and body image to support weight maintenance e.g. forming friendships with physically active peers; modify energy intake from weight loss treatment to an individualised level consistent with weight maintenance<br><br><b>IG3:</b> FBT only, no maintenance treatment<br><br><b>P:</b> NR | <b>BMI z-score</b><br>IG1, pre-post: -0.27 (0.04)*<br>Pre-FU: -0.19 (0.05)*<br><br>IG2, pre-post: -0.27 (0.05)*<br>Pre-FU: -0.24 (0.05)*<br><br>IG3, pre-post: -0.27 (0.04)*<br>Pre-FU: -0.22 (0.05)* | ED risk (ChEDE)<br><br>Outcomes NR at follow-up                                                      |
| Goossen et al. 2011 <sup>25</sup> ; Belgium; pre-post; inpatient; neutral<br><br>Reports follow-up only | n=108, 68% F<br><br>10-17y, 13.06 (1.99)y<br><br>BMI >95 <sup>th</sup> percentile<br>BMI 31.9 (4.43)<br>kg/m <sup>2</sup>                               | 10 mo<br><br>Inpatient program<br><br>Follow-up 6 years from baseline                                                                                                                                                                                          | <b>IG:</b> ‘non-diet’ healthy lifestyle program; 1400-1600 kcal/d energy intake, 3 meals and 2 snacks; structured PA, 4 hr/wk individualised program and 10 hr/wk organised sport; small group CBT program for 12 wk including self-regulation, self-evaluation, self-reward, and development of a personal plan. Parents education biweekly, on preparing healthy food, shopping and aerobic exercises                                                                                                                                                                                                                                                                                                                                                                                                                                                                                                                                                                                                                                                                                                          | <b>BMI</b><br>Pre-FU: -0.36 (0.48)<br>kg/m <sup>2</sup>                                                                                                                                               | Binge eating (ChEDE)<br>Binge eating disorder (ChEDE)<br>Bulimic symptoms (EDI-II)<br>Eating concern |

|                                                                                                                                                                                                                        |                                                                                                                                                                                        |                                                                                                                                                                                                                                                                                                                                                                                                           |                                                                                                                                                                                                                                                                                                                                                                                                                                                                                                                                                                                                                                                                                                                                                                                       |                                                                                                                                                                                                                      |                                           |
|------------------------------------------------------------------------------------------------------------------------------------------------------------------------------------------------------------------------|----------------------------------------------------------------------------------------------------------------------------------------------------------------------------------------|-----------------------------------------------------------------------------------------------------------------------------------------------------------------------------------------------------------------------------------------------------------------------------------------------------------------------------------------------------------------------------------------------------------|---------------------------------------------------------------------------------------------------------------------------------------------------------------------------------------------------------------------------------------------------------------------------------------------------------------------------------------------------------------------------------------------------------------------------------------------------------------------------------------------------------------------------------------------------------------------------------------------------------------------------------------------------------------------------------------------------------------------------------------------------------------------------------------|----------------------------------------------------------------------------------------------------------------------------------------------------------------------------------------------------------------------|-------------------------------------------|
|                                                                                                                                                                                                                        |                                                                                                                                                                                        | <b>R:</b> 52% at 6y                                                                                                                                                                                                                                                                                                                                                                                       | <b>P:</b> Multidisciplinary team                                                                                                                                                                                                                                                                                                                                                                                                                                                                                                                                                                                                                                                                                                                                                      |                                                                                                                                                                                                                      | (ChEDE)<br>Drive for thinness<br>(EDI-II) |
| Halberstadt et al. 2016 <sup>26</sup> ; HEILOS; Netherlands; pre-post; inpatient and outpatient; neutral                                                                                                               | n=120, 67% F<br>8-19y, 14.8 (2.4)y<br><br>BMI z-score≥3.0<br>BMI z-score 3.42 (0.38)                                                                                                   | 12 mo<br><br><b>IG1:</b> Inpatient program 5 d/wk for 6 mo, then 2 d/wk for 6 mo<br><br><b>IG2:</b> Inpatient program 5 d/wk for 2 mo, then 2 d/wk biweekly for 4 mo, then 2 d/wk for 6 mo<br><br>Inpatient stay: individual and group sessions; 4 exercise classes/wk; nutrition education 1/wk, behaviour modification 1/wk<br><br>Follow-up 24 mo from baseline<br><br>R: 83% at 12 mo<br>76% at 24 mo | All participants completed the same treatment with varying duration of inpatient stay. Nutrition education, not primarily aimed at calorie restriction, eating styles (external, emotional, restraint) addressed; exercise classes during inpatient treatment; nutrition and exercise goals for weekends at home; behaviour modification topics including self-regulation, stimulus control, problem solving<br><br><b>IG1:</b> 6 mo inpatient component<br><b>IG2:</b> 2 mo inpatient component<br><br><b>P:</b> Multidisciplinary team                                                                                                                                                                                                                                              | <b>BMI</b><br>Combined groups, pre-post: -4.29 (0.51) kg/m <sup>2</sup> *<br>Pre-FU: -1.65 (0.51) kg/m <sup>2</sup> *<br><br><b>BMI z-score</b><br>Combined groups, pre-post: -0.41 (0.05)*<br>Pre-FU: -0.25 (0.05)* | Emotional eating<br>(DEBQ)                |
| Ho et al. 2013 <sup>27</sup> ; Gow et al. 2016 <sup>28</sup> ; Researching Effective Strategies to Improve Insulin Sensitivity in Children and Teenagers (RESIST) trial; Australia; RCT; tertiary outpatient; positive | n=111 (IG1 55, IG2 56), 59% F<br><br>10-17y, median age (range) 13.2 (10.1 to 17.4)y<br><br>Overweight/obesity and/or clinical insulin resistance<br>BMI 34.1 (5.37) kg/m <sup>2</sup> | 12 mo<br><br><b>Baseline-3 mo:</b> 4 x 1-hr individual dietitian consults + 2 phone calls + 2 medical consults<br><b>4-6 mo:</b> 1 x dietitian consult + 3 support contact (phone, SMS, email) + 1 medical consult + 2 x 60 min gym sessions/wk + 1 x home exercise session/wk<br><b>7-12 mo:</b> 1x60 min dietitian consult + 3x support + 1x medical                                                    | Three-phase intervention. All participants treated with metformin and received the same lifestyle intervention with differing macronutrient composition.<br><br><b>Phase 1:</b> intensive dietary intervention, meal plans provided, nutrition and PA education; coaching framework to support behaviour change, goal setting, self-monitoring, self-efficacy<br><b>Phase 2:</b> ongoing dietary support; intensive small group exercise program, circuit and resistance training<br><b>Phase 3:</b> maintenance phase; encouraged to continue with prescribed diet and exercise regime at home<br><br>Energy prescription for both groups was 6,000 to 7,000 kJ/d (10-14y) or 7,000 to 8,000 kJ/d (15-17y).<br><br><b>IG1:</b> high carbohydrate, low fat diet - 55-60% carbohydrate | <b>BMI %95<sup>th</sup> percentile</b><br>Combined groups, pre-post: -6.90 (1.00)*<br>Pre-FU: -3.10 (1.80)                                                                                                           | Emotional eating<br>(EPI-C)               |

|                                                                                              |                                                                                                                                    |                                                                                                                                                 |                                                                                                                                                                                                                                                                                                                                                                                                                                                                        |                                                                                                                                                                                                   |                                                                             |
|----------------------------------------------------------------------------------------------|------------------------------------------------------------------------------------------------------------------------------------|-------------------------------------------------------------------------------------------------------------------------------------------------|------------------------------------------------------------------------------------------------------------------------------------------------------------------------------------------------------------------------------------------------------------------------------------------------------------------------------------------------------------------------------------------------------------------------------------------------------------------------|---------------------------------------------------------------------------------------------------------------------------------------------------------------------------------------------------|-----------------------------------------------------------------------------|
|                                                                                              |                                                                                                                                    | consult<br><br>Follow-up 24 mo from baseline<br><br><b>R:</b> 77% at 12mo<br>38% at 24 mo                                                       | (moderate GI), 30% fat (<10% saturated) and 15% protein<br><br><b>IG2:</b> moderate carbohydrate, increased protein diet - 40-45% carbohydrate (moderate GI), 30% fat (<10% saturated) and 25-30% protein<br><br><b>P:</b> Multidisciplinary team                                                                                                                                                                                                                      |                                                                                                                                                                                                   |                                                                             |
| Jansen et al. 2011 <sup>29</sup> ; 'Finger in the pie'; Netherlands; RCT; community; neutral | n=98 (IG 59, CG 39)<br><br>7-13y, 9.72 (1.6)y<br><br>≥130% overweight<br>BMI percentile IG 96.8 (2.93), CG 95.9 (3.38)             | 10 wk<br><br>8 x 2 hr group sessions<br><br>Follow-up 5.5 mo from baseline<br><br><b>R:</b> 85% at 10 wk and 5.5 mo                             | <b>IG:</b> parent focused CBT; aiming to teach parents to think of solutions themselves rather than present information; creating realistic expectations, modifying eating and exercising habits, how parents can influence the behaviour of their children e.g. rewards, modelling, guilt and low self-esteem<br><br><b>Wait-list CG:</b> offered treatment after 6 mo (data combined with IG due to low uptake of treatment)<br><br><b>P:</b> Trained CBT therapists | <b>BMI</b><br>IG pre-post: -2.3 (0.64) kg/m <sup>2</sup> *<br>Pre-FU: -2.1 (0.65) kg/m <sup>2</sup> *<br><br>CG, pre-post: -0.1 (0.44) kg/m <sup>2</sup><br>Pre-FU: -0.2 (0.46) kg/m <sup>2</sup> | Eating concern (ChEDE-Q)                                                    |
| Kotler et al. 2006 <sup>30</sup> ; USA; pre-post; tertiary outpatient; neutral               | n=16, 100% F<br><br>12-15y, 13.2 (1.1)y<br><br>BMI≥95 <sup>th</sup> percentile<br>BMI 36.8 (5.5) kg/m <sup>2</sup>                 | 6 wk<br><br>Daily attendance at the service for adolescents; weekly parent group<br><br>Nil follow-up<br><br><b>R:</b> 100%                     | <b>IG:</b> program focused on healthy eating and PA education without explicit focus on large amounts of weight loss; shopping and cooking, all meals provided at the program (no energy prescription reported), PA provided through trips to recreational facilities; behavioural therapy group, art therapy and yoga<br><br><b>P:</b> NR                                                                                                                             | No significant change in BMI (data NR)                                                                                                                                                            | ED risk (EAT)                                                               |
| Levine et al. 2001 <sup>31</sup> ; USA; pre-post; community; neutral                         | n=24, 46% F<br><br>8-12y, 10.2 (1.5)y<br><br>>160% of ideal body weight (WHO reference charts)<br>BMI 34.5 (5.2) kg/m <sup>2</sup> | 10-12 wk<br><br>Weekly group sessions<br><br>Follow-up 7-16 mo from baseline (mean 11 mo)<br><br><b>R:</b> 67% post-intervention; 50% follow-up | <b>IG:</b> Behavioural group program; nutrition education of Stoplight Diet, calorie target of 1200-1500kcal/d based on child's initial weight; exercise goals to work towards 30 min/d of activity on 5 d/wk and reduce sedentary behaviours, plus weekly group exercise activity e.g. walk; self-monitoring, portion size control, emotions, teasing and relapse prevention<br><br><b>P:</b> NR                                                                      | <b>BMI</b><br>Pre-post: -1.70 (1.06) kg/m <sup>2</sup><br><br>No significant change between baseline and follow-up                                                                                | ED risk (ChEAT)<br><br>Outcome reported between baseline and follow-up only |
| Murdoch et al. 2011 <sup>32</sup> ; UK; pre-post; community; neutral                         | n=17, 53% F<br><br>7.5-14y, 10.5 (1.82)y<br><br>BMI>98 <sup>th</sup> percentile<br>BMI z-score 3.16                                | 6 mon<br><br>1.5 hr group sessions, 10 weekly then 5 biweekly<br><br>Nil follow-up                                                              | <b>IG:</b> Children attend group with one parent; nutrition education based on TLD; PA education, encourage 60 min/d and reduced sedentary time; behavioural therapy including self-monitoring, goal setting, positive reinforcement, stimulus control, teasing, problem-solving; parent education on supporting the child                                                                                                                                             | <b>BMI z-score</b><br>Pre-post: -0.06 (0.10)                                                                                                                                                      | Bulimic symptoms (ChEAT)                                                    |

|                                                                                                                                      |                                                                                                                                                                                               |                                                                                                                                                                              |                                                                                                                                                                                                                                                                                                                                                                                                                       |                                                                                                                                                                |                                                                                                                      |
|--------------------------------------------------------------------------------------------------------------------------------------|-----------------------------------------------------------------------------------------------------------------------------------------------------------------------------------------------|------------------------------------------------------------------------------------------------------------------------------------------------------------------------------|-----------------------------------------------------------------------------------------------------------------------------------------------------------------------------------------------------------------------------------------------------------------------------------------------------------------------------------------------------------------------------------------------------------------------|----------------------------------------------------------------------------------------------------------------------------------------------------------------|----------------------------------------------------------------------------------------------------------------------|
|                                                                                                                                      | (0.56)                                                                                                                                                                                        | <b>R:</b> 61%                                                                                                                                                                | <b>P:</b> Dietitian, psychologist                                                                                                                                                                                                                                                                                                                                                                                     |                                                                                                                                                                |                                                                                                                      |
| Sarvestani et al. 2009 <sup>33</sup> ; Iran; RCT; community; neutral                                                                 | n=60 (IG1 30, IG2 30), 100%F<br><br>11-15y, IG 13.5 (0.97)y, IG2 12.93 (0.88)y<br><br>BMI>95 <sup>th</sup> percentile<br>BMI IG 29.55 kg/m <sup>2</sup> , IG2 29.07 kg/m <sup>2</sup> (SD NR) | 16 wk<br><br>4 hr group session/wk (2 hr behaviour modification or nutrition education + 2 hr yoga)<br><br>Nil follow-up<br><br><b>R:</b> 80%                                | <b>IG1:</b> 4 x visits with dietitian, provided with balanced diet for their age and weight; nutrition education; yoga classes; PA education, aim to exercise 3d/wk; behavioural strategies such as self-assessments, food and activity diary, problem solving<br><br><b>IG2:</b> participants attended 3 sessions of the same program<br><br><b>P:</b> Dietitian and nurse                                           | <b>BMI</b> (baseline, 6 months, SD NR)<br>IG1: 29.55 kg/m <sup>2</sup> , 28.48 kg/m <sup>2</sup><br><br>IG2: 29.07 kg/m <sup>2</sup> , 29.31 kg/m <sup>2</sup> | Emotional eating (DEBQ)                                                                                              |
| Shomaker et al. 2017 <sup>34</sup> ; USA; RCT; tertiary outpatient; positive<br><br>(Healthy eating arm only met inclusion criteria) | n=14, 79% F<br><br>8-13y, 11.0 (1.0)y<br><br>BMI≥85 <sup>th</sup> percentile<br>BMI z-score 2.0 (0.4)                                                                                         | 12 wk<br><br>Weekly 45 min individual sessions<br><br>Follow-up 12 mo from baseline<br><br><b>R:</b> 86% at 12 wk; 57% at 12 mo                                              | <b>IG:</b> FBT delivered to parent/child dyads; healthy eating principles; exercise and PA education and home options<br><br><b>P:</b> Clinical psychologist, clinical psychology students                                                                                                                                                                                                                            | <b>BMI</b><br>Pre-post: 7.92 (1.79) kg/m <sup>2</sup> *<br>Pre-FU: 11.92 (2.53)*<br><br><b>BMI z-score</b><br>Pre-post: 0.01 (0.02)<br>Pre-FU: -0.04 (0.05)    | ED risk (ChEDE)<br><br>Outcome reported between baseline and follow-up only                                          |
| Tyler et al. 2016 <sup>35</sup> ; USA; RCT; school based health clinic; positive                                                     | n=80 (IG1 38, IG2 42), 57% F<br><br>8-12y, 9.4 (1.3)y<br><br>BMI≥95 <sup>th</sup> percentile<br>BMI z-score IG 2.25 (0.33), CG 2.23 (0.32)                                                    | 9 mo<br><br><b>IG1:</b> 7 x 30 min visits<br><br><b>IG2:</b> 1 x information session+ 3 x data collection only visits<br><br>Nil follow-up<br><br><b>R:</b> IG1 71%, IG2 43% | <b>IG1:</b> negotiated weight management intervention for parent child dyads; focus on weight-related behaviours, nutrition education; given pedometer and jump rope to encourage PA; negotiation techniques based on motivational interviewing principles and strategies<br><br><b>IG2:</b> received the same weight management education from a nurse in one session<br><br><b>P:</b> Paediatric nurse practitioner | <b>BMI z-score</b><br>IG1, pre-post: -0.07 (0.05)<br><br>IG2, pre-post: -0.25 (0.06)*                                                                          | ED risk (ChEAT)                                                                                                      |
| Van Vlierberghe et al. 2009 <sup>36</sup> ; Belgium; pre-post; inpatient; neutral                                                    | n=76, 67% F (subsample of 39 completed ED related outcomes)<br><br>14-18y, 15.11 (1.15)y, subsample 15.23 (1.23)y                                                                             | 10 mo<br><br>Nil follow-up<br><br><b>R:</b> 87% whole group, 79% subsample                                                                                                   | <b>IG:</b> 'non-diet' healthy lifestyle program; 1400-1600 kcal/d energy intake, 3 meals and 2 snacks; structured PA, 4 hr/wk individualised program and 10 hr/wk organised sport; small group CBT program for 12 wk including self-regulation, self-evaluation, self-reward, and development of a personal plan. Parents education biweekly, on preparing healthy food, shopping and aerobic exercises               | <b>Mean percentage weight loss</b><br>Pre-post: 52.5 (2.09)% (range 18.2 to 107.4%)                                                                            | Binge eating (ChEDE)<br>Binge eating disorder (KID-SCID/ChEDE)<br>Bulimia nervosa (KID-SCID/ChEDE)<br>Eating concern |

|  |                                                               |  |                             |  |         |
|--|---------------------------------------------------------------|--|-----------------------------|--|---------|
|  | BMI≥95 <sup>th</sup> percentile<br>BMI z-score 2.25<br>(0.28) |  | P: Paediatrician, therapist |  | (EDE-Q) |
|--|---------------------------------------------------------------|--|-----------------------------|--|---------|

Abbreviations: BES, Binge Eating Scale; BITE, Bulimic Investigatory Test; CBT, Cognitive behavioural therapy; CEBQ, Children's Eating Behaviour Questionnaire; CG, control group; ChEAT, Children's Eating Attitudes Test; ChEDE, Child Eating Disorder Examination; DBT, Dialectical behaviour therapy; DEBQ, Dutch Eating Behaviour Questionnaire; EAT, Eating Attitudes Test; EAT-26, Eating Attitudes Test – 26 item; EDE, Eating Disorder Examination; EDE-Q, Eating Disorder Examination Questionnaire; EDI, Eating Disorder Inventory; EDI-II, Eating Disorder Inventory- 2<sup>nd</sup> edition; EES, Emotional Eating Scale; EPI-C, Eating Pattern Inventory for Children; F, female; FBT, Family-based treatment; FU, follow-up; IG, intervention group; KEDS, Kids Eating Disorder Survey; KID-SCID, Structured Clinical Interview for DSM-IV-Childhood version; NR, not reported; PA, physical activity; pre-post, non-controlled trial; QEWP-A, Questionnaire of Eating and Weight; RCT, randomised-controlled trial; TFEQ, Three-Factor Eating questionnaire; TLD, traffic light diet

\*Change from baseline, P<0.05

<sup>a</sup>Post-treatment data obtained from Janicke et al. 2008<sup>37</sup>

## REFERENCES

1. Bonham MP, Dordevic AL, Ware RS, Brennan L, Truby H. Evaluation of a Commercially Delivered Weight Management Program for Adolescents. *Journal of pediatrics*. 2017;03.
2. Boutelle KN, Braden A, Knatz-Peck S, Anderson LK, Rhee KE. An open trial targeting emotional eating among adolescents with overweight or obesity. *Eating Disorders: The Journal of Treatment & Prevention*. 2018;26(1):79-91.
3. Braet C, Van Winckel M. Long-term follow-up of a cognitive behavioral treatment program for obese children. *Behavior Therapy*. 2000;31(1):55-74.
4. Braet C, Tanghe A, Decaluwe V, Moens E, Rosseel Y. Inpatient treatment for children with obesity: weight loss, psychological well-being, and eating behavior. *Journal of Pediatric Psychology*. 2004;29(7):519-529.
5. Braet C. Patient characteristics as predictors of weight loss after an obesity treatment for children. *Obesity*. 2006;14(1):148-155.
6. Braet C, Tanghe A, Bode PD, Franckx H, Winckel MV. Inpatient treatment of obese children: a multicomponent programme without stringent calorie restriction. *European Journal of Pediatrics*. 2003;162(6):391-396.
7. Brennan L, Wilks R, Walkley J, Fraser SF, Greenway K. Treatment acceptability and psychosocial outcomes of a randomised controlled trial of a cognitive behavioural lifestyle intervention for overweight and obese adolescents. *Behaviour Change*. 2012;29(1):36-62.
8. Carnier J, Lofrano MC, Prado WL, et al. Hormonal alteration in obese adolescents with eating disorder: effects of multidisciplinary therapy. *Hormone Research*. 2008;70(2):79-84.
9. Lofrano-Prado MC, Antunes HK, do Prado WL, et al. Quality of life in Brazilian obese adolescents: effects of a long-term multidisciplinary lifestyle therapy. *Health & Quality of Life Outcomes*. 2009;7:61.
10. Carnier J, de Piano A, de Lima Sanches P, et al. The role of orexigenic and anorexigenic factors in an interdisciplinary weight loss therapy for obese adolescents with symptoms of eating disorders. *International Journal of Clinical Practice*. 2010;64(6):784-790.
11. Carnier J, de Lima Sanches P, da Silva PL, et al. Obese adolescents with eating disorders: Analysis of metabolic and inflammatory states. *Physiology & Behavior*. 2012;105(2):175-180.

12. Damaso AR, De Piano A, Campos RMDS, et al. Multidisciplinary approach to the treatment of obese adolescents: Effects on cardiovascular risk factors, inflammatory profile, and Neuroendocrine Regulation of Energy Balance. *International Journal of Endocrinology*. 2013;2013 (no pagination)(541032).
13. Chirita-Emandi A, Puiu M. Outcomes of neurofeedback training in childhood obesity management: A pilot study. *The Journal of Alternative and Complementary Medicine*. 2014;20(11):831-837.
14. Cohen TR, Hazell TJ, Vanstone CA, Rodd C, Weiler HA. Changes in eating behavior and plasma leptin in children with obesity participating in a family-centered lifestyle intervention. *Appetite*. 2018;125:81-89.
15. Croker H, Viner RM, Nicholls D, et al. Family-based behavioural treatment of childhood obesity in a UK National Health Service setting: randomized controlled trial. *International journal of obesity (2005)*. 2012;36(1):16-26.
16. DeBar LL, Stevens VJ, Perrin N, et al. A primary care-based, multicomponent lifestyle intervention for overweight adolescent females. *Pediatrics*. 2012;129(3):e611-e620.
17. de Niet J, Timman R, Bauer S, et al. The effect of a short message service maintenance treatment on body mass index and psychological well-being in overweight and obese children: a randomized controlled trial. *Pediatric Obes*. 2012;7(3):205-219.
18. De Miguel-Etayo P, Muro C, Santabarbara J, et al. Behavioral predictors of attrition in adolescents participating in a multidisciplinary obesity treatment program: EVASYON study. *International Journal of Obesity*. 2016;40(1):84-87.
19. Edwards C, Nicholls D, Croker H, Van Zyl S, Viner R, Wardle J. Family-based behavioural treatment of obesity: acceptability and effectiveness in the UK. *European Journal of Clinical Nutrition*. 2006;60(5):587-592.
20. Epstein LH, Paluch RA, Saelens BE, Ernst MM, Wilfley DE. Changes in eating disorder symptoms with pediatric obesity treatment. *The Journal of pediatrics*. 2001;139(1):58-65.
21. Estabrooks PA, Shoup JA, Gattshall M, Dandamudi P, Shetterly S, Xu S. Automated telephone counseling for parents of overweight children: a randomized controlled trial. *American journal of preventive medicine*. 2009;36(1):35-42.
22. Fennig S, Brunstein-Klomek A, Sasson A, Halifa Kurtzman I, Hadas A. Feasibility of a Dual Evaluation/Intervention Program for Morbidly Obese Adolescents. *Israel Journal of Psychiatry & Related Sciences*. 2015;52(2):107-112.
23. Follansbee-Junger K, Janicke DM, Sallinen BJ. The influence of a behavioral weight management program on disordered eating attitudes and behaviors in children with overweight. *Journal of the American Dietetic Association*. 2010;110(11):1653-1659.
24. Goldschmidt AB, Best JR, Stein RI, Saelens BE, Epstein LH, Wilfley DE. Predictors of child weight loss and maintenance among family-based treatment completers. *Journal of Consulting & Clinical Psychology*. 2014;82(6):1140-1150.
25. Goossens L, Braet C, Verbeken S, Decaluwe V, Bosmans G. Long-term outcome of pediatric eating pathology and predictors for the onset of loss of control over eating following weight-loss treatment. *International Journal of Eating Disorders*. 2011;44(5):397-405.
26. Halberstadt J, van Strien T, de Vet E, Eekhout I, Braet C, Seidell JC. The association of eating styles with weight change after an intensive combined lifestyle intervention for children and adolescents with severe obesity. *Appetite*. 2016;99:82-90.
27. Ho M, Gow M, Halim J, et al. Effect of a prescriptive dietary intervention on psychological dimensions of eating behavior in obese adolescents. *The international journal of behavioral nutrition and physical activity*. 2013;10(119):24.
28. Gow ML, Baur LA, Ho M, et al. Can early weight loss, eating behaviors and socioeconomic factors predict successful weight loss at 12- and 24-months in adolescents with obesity and insulin resistance participating in a randomised controlled trial? *International journal of behavioral nutrition and physical activity*. 2016;13(1):1.
29. Jansen E, Mulkens S, Jansen A. Tackling childhood overweight: treating parents exclusively is effective. *International Journal of Obesity*. 2011;35(4):501-509.
30. Kotler LA, Etu SF, Davies M, Devlin MJ, Attia E, Walsh BT. An open trial of an intensive summer day treatment program for severely overweight adolescents. *Eating & Weight Disorders: EWD*. 2006;11(4):e119-122.

31. Levine MD, Ringham RM, Kalarchian MA, Wisniewski L, Marcus MD. Is family-based behavioral weight control appropriate for severe pediatric obesity? *International Journal of Eating Disorders*. 2001;30(3):318-328.
32. Murdoch M, Payne N, Samani-Radia D, et al. Family-based behavioural management of childhood obesity: service evaluation of a group programme run in a community setting in the United Kingdom. *European Journal of Clinical Nutrition*. 2011;65(6):764-767.
33. Sarvestani RS, Jamalfard MH, Kargar M, Kaveh MH, Tabatabaee HR. Effect of dietary behaviour modification on anthropometric indices and eating behaviour in obese adolescent girls. *Journal of Advanced Nursing*. 2009;65(8):1670-1675.
34. Shomaker LB, Tanofsky-Kraff M, Matherne CE, et al. A randomized, comparative pilot trial of family-based interpersonal psychotherapy for reducing psychosocial symptoms, disordered-eating, and excess weight gain in at-risk preadolescents with loss-of-control-eating. *International journal of eating disorders*. 2017;50(9):1084-1094.
35. Tyler DO, Horner SD. A primary care intervention to improve weight in obese children: A feasibility study. *Journal of the American Association of Nurse Practitioners*. 2016;28(2):98-106.
36. Vlierberghe LV, Braet C, Goossens L, Rosseel Y, Mels S. Psychological disorder, symptom severity and weight loss in inpatient adolescent obesity treatment. *International Journal of Pediatric Obesity*. 2009;4(1):36-44.
37. Janicke DM, Sallinen BJ, Perri MG, et al. Comparison of Parent-Only vs Family-Based Interventions for Overweight Children in Underserved Rural Settings: Outcomes From Project STORY. *Archives of Pediatrics & Adolescent Medicine*. 2008;162(12):1119-1125.

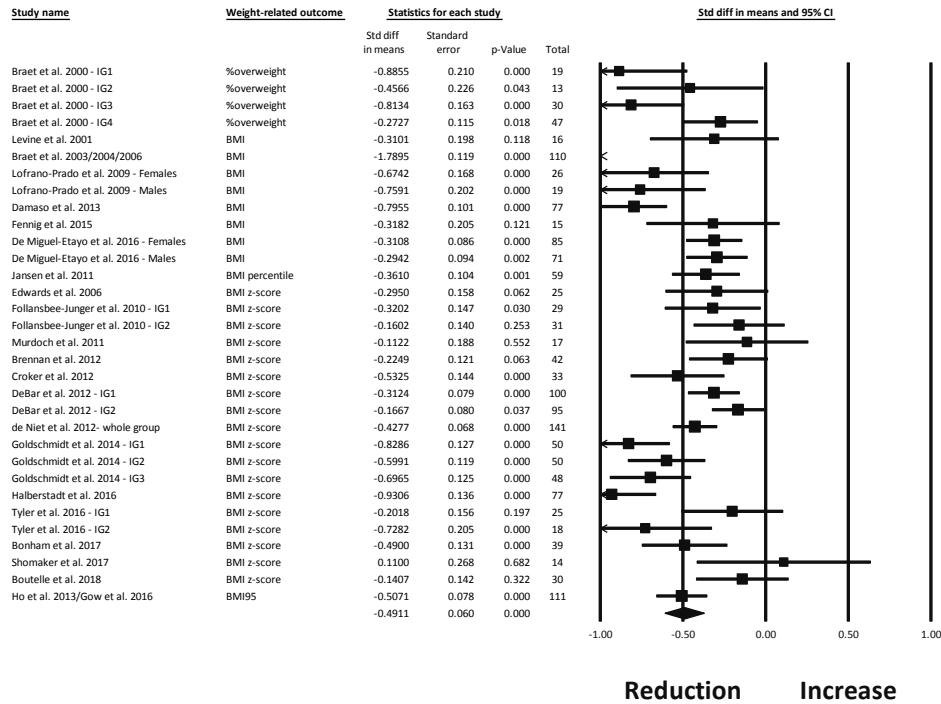

A – Pre-post intervention

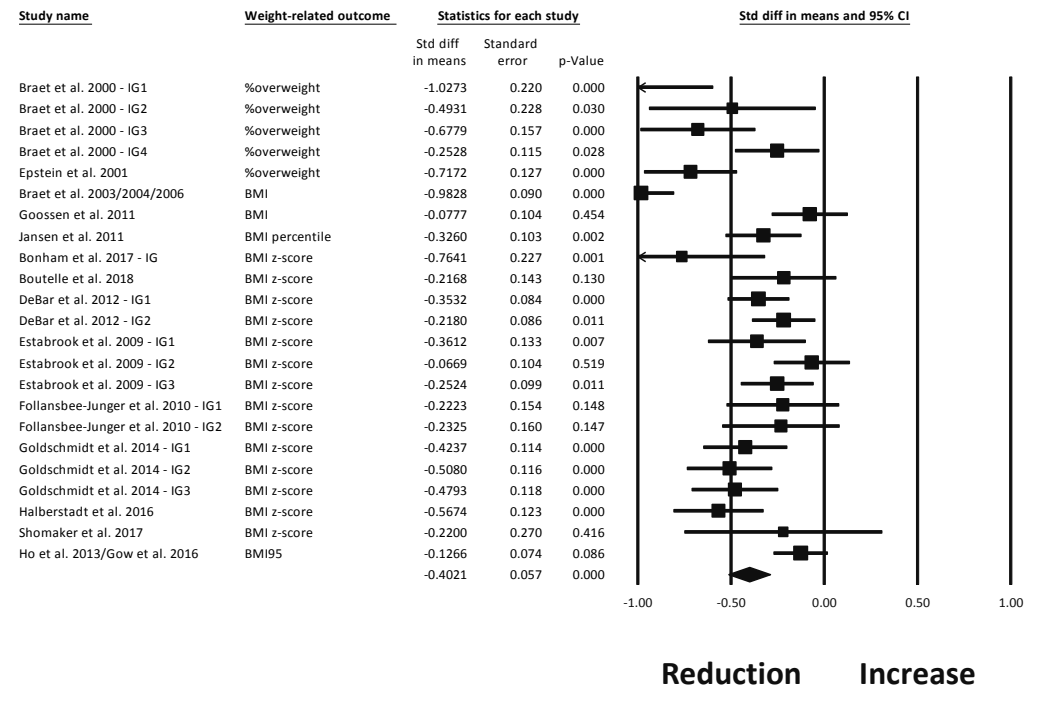

B – Baseline to latest follow-up

**Figure S1: Meta-analysis of the change in weight-related outcomes between pre- and post-intervention (A) and between baseline and the latest follow-up timepoint (B), following obesity treatment with a dietary component in children and adolescents with overweight and obesity.**

Results are presented as Standardised Mean Difference (SE) using a random effects model

Abbreviations: %overweight, percentage overweight calculated based on normative data; BMI, body mass index; BMI95, BMI expressed as a percentage of the 95<sup>th</sup> percentile; IG, intervention group



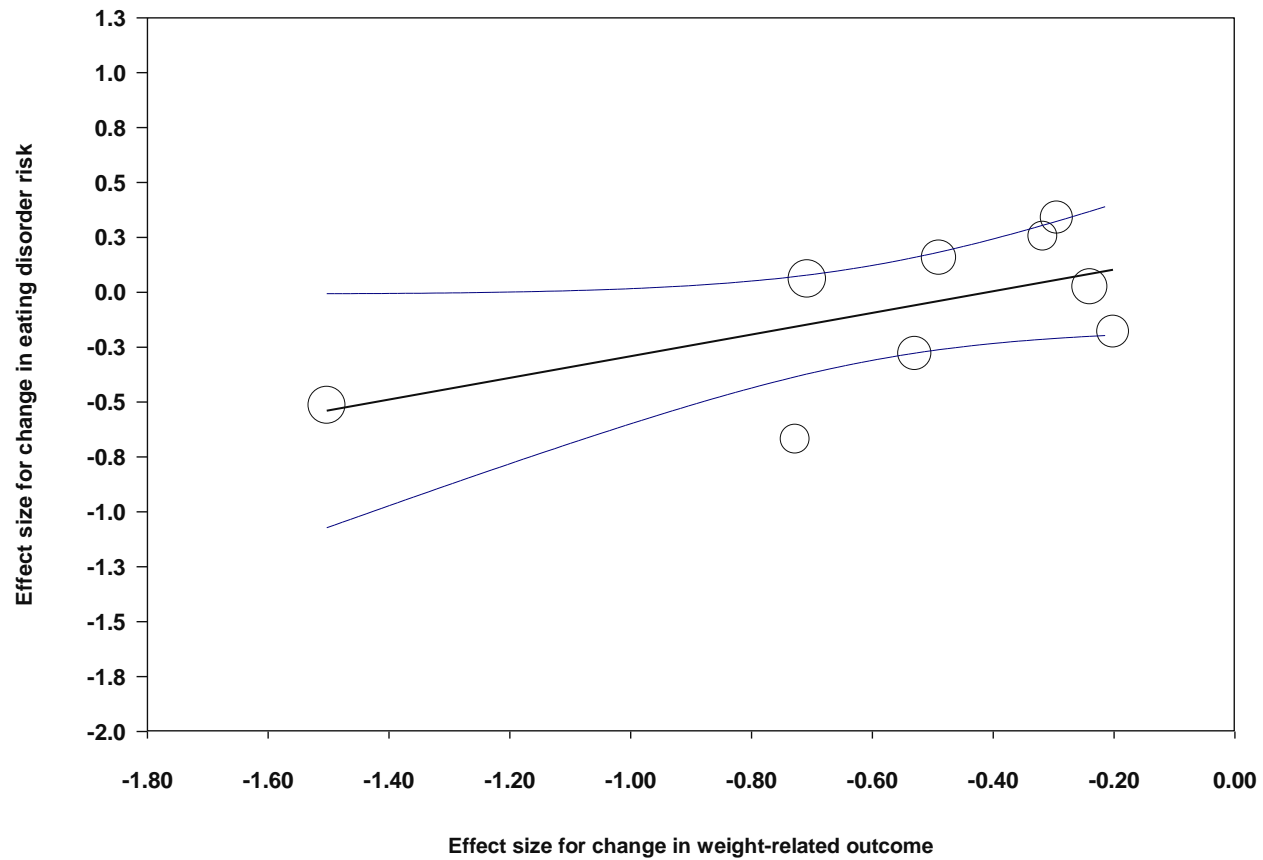

Figure S2: Meta-regression of the effect size for change in eating disorder risk and the effect size for change in weight-related outcomes between pre- and post-intervention following professionally administered obesity treatment with a dietary component in children and adolescents with overweight and obesity ( $R^2=0.43$ ,  $p=0.02$ )
